# Supplementary material for: Right Iliac Fossa Pain Treatment (RIFT) Study: protocol for an international, multicentre, prospective observational study
Source: PubMed Central journal article supplement — BMJ Open. 2018 Jan 13;8(1):e017574. doi: 10.1136/bmjopen-2017-017574 (PMC5780718; doi:10.1136/bmjopen-2017-017574), 2018-01-13
Supplement: bmjopen-2017-017574.draft_revisions.pdf [file bmjopen-2017-017574.draft_revisions.pdf]

# BMJ Open

BMJ Open is committed to open peer review. As part of this commitment we make the peer review history of every article we publish publicly available.

When an article is published we post the peer reviewers' comments and the authors' responses online. We also post the versions of the paper that were used during peer review. These are the versions that the peer review comments apply to.

The versions of the paper that follow are the versions that were submitted during the peer review process. They are not the versions of record or the final published versions. They should not be cited or distributed as the published version of this manuscript.

BMJ Open is an open access journal and the full, final, typeset and author-corrected version of record of the manuscript is available on our site with no access controls, subscription charges or pay-per-view fees (<http://bmjopen.bmj.com>).

If you have any questions on BMJ Open's open peer review process please email [info.bmjopen@bmj.com](mailto:info.bmjopen@bmj.com)

# BMJ Open

## Right Iliac Fossa Pain Treatment (RIFT) Study: Protocol for an international, multicentre, prospective observational study

|                                 |                                                                                                                                                                                                                                                                                      |
|---------------------------------|--------------------------------------------------------------------------------------------------------------------------------------------------------------------------------------------------------------------------------------------------------------------------------------|
| Journal:                        | <i>BMJ Open</i>                                                                                                                                                                                                                                                                      |
| Manuscript ID                   | bmjopen-2017-017574                                                                                                                                                                                                                                                                  |
| Article Type:                   | Protocol                                                                                                                                                                                                                                                                             |
| Date Submitted by the Author:   | 06-May-2017                                                                                                                                                                                                                                                                          |
| Complete List of Authors:       | on behalf of the West Midlands Research Collaborative, The Right Iliac Fossa Pain Treatment ; The West Midlands Research Collaborative, The department of Academic Surgery, University of Birmingham<br>Nepogodiev, Dmitri; University of Birmingham, Academic Department of Surgery |
| <b>Primary Subject Heading</b>: | Surgery                                                                                                                                                                                                                                                                              |
| Secondary Subject Heading:      | Evidence based practice, Emergency medicine                                                                                                                                                                                                                                          |
| Keywords:                       | appendicitis, appendectomy, right iliac fossa pain, Abdominal pain, SURGERY                                                                                                                                                                                                          |
|                                 |                                                                                                                                                                                                                                                                                      |

SCHOLARONE™  
Manuscripts

1  
2 **Right Iliac Fossa Pain Treatment (RIFT) Study: Protocol for an international,**  
3  
4 **multicentre, prospective observational study**  
5  
6  
7

8  
9 The Right Iliac Fossa Pain Treatment (RIFT) Study Group on behalf of West Midlands  
10  
11 Research Collaborative (WMRC)\*  
12  
13

14  
15 \*Collaborating members are listed in the Appendix  
16  
17

18  
19 Corresponding author:  
20

21 Dmitri Nepogodiev MBChB  
22

23 West Midlands Research Collaborative  
24

25 Academic Department of Surgery  
26

27 4<sup>th</sup> Floor, Heritage Building  
28

29 Mindelsohn Road  
30

31 Birmingham, B15 2TH,  
32

33 UK  
34

35  
36  
37 Tel: +44 7776214335  
38

39  
40 Email: d.nepogodiev@bham.ac.uk  
41  
42  
43  
44  
45  
46

47 Article type: Study Protocol  
48

49 Abstract word count: 264  
50

51 Word Count: 1808  
52

53  
54 Keywords: Abdominal pain; surgery; appendicitis; appendicectomy; right iliac fossa pain.  
55  
56  
57  
58  
59  
60

1  
2  
3  
4  
5  
6  
7  
8  
9  
10  
11  
12  
13  
14  
15  
16  
17  
18  
19  
20  
21  
22  
23  
24  
25  
26  
27  
28  
29  
30  
31  
32  
33  
34  
35  
36  
37  
38  
39  
40  
41  
42  
43  
44  
45  
46  
47  
48  
49  
50  
51  
52  
53  
54  
55  
56  
57  
58  
59  
60

For peer review only

## Abstract

### Introduction

Patients presenting with right iliac fossa (RIF) pain are a common challenge for acute general surgical services. Given the range of potential pathologies, RIF pain creates diagnostic uncertainty and there is subsequent variation in investigation and management. Appendicitis is a diagnosis which must be considered in all patients with RIF pain, however over a fifth of patients undergoing appendicectomy, in the UK, have been proven to have a histologically normal appendix (negative appendicectomy). The primary aim of this study is to determine the contemporary negative appendicectomy rate. The study's secondary aims are to determine the rate of laparoscopy for appendicitis and to validate the Appendicitis Inflammatory Response (AIR) and Alvarado prediction scores.

### Methods and Analysis

This multicentre, international prospective observational study will include all patients referred to surgical specialists with either RIF pain or suspected appendicitis. Consecutive patients presenting across four, two-week long data collection periods will be included. Data will be captured using a secure online data management system. A centre survey will profile local policy and service delivery for management of RIF pain.

### Ethics and dissemination

Research ethics are not required for this study in the UK, as determined using the National Research Ethics Service decision tool. This study will be registered as a clinical audit in participating UK centres. National leads in countries outside the UK will oversee appropriate registration and study approval, which may include completing full ethical review. The study will be disseminated by trainee-led research collaboratives and through

1  
2 social media. Peer-reviewed publications will be published under corporate authorship  
3  
4 including 'RIFT Study Group' and 'West Midlands Research Collaborative'.  
5  
6  
7

### 8 **Strengths and limitations of this study**

- 9
- 10 • This study will collect prospective, observational data on a large number of patients  
11 across Europe. A pre-planned validation process will verify case ascertainment and  
12 data accuracy.  
13
  - 14 • The study uses the UK National Research Collaborative model to capture high-  
15 quality data whilst minimising the burden on participating centres.  
16
  - 17 • Unlike previous studies, the clinical risk scores will be validated against a  
18 prospective cohort of patients presenting with undifferentiated right iliac fossa pain,  
19 rather than patients who have undergone appendicectomy.  
20
  - 21 • Within the remit of this observational study, it will not be possible track patient re-  
22 admissions to centres other than the index admitting hospital, or readmission rates  
23 beyond 30 days.  
24
  - 25 • This protocol is designed to be carried out alongside routine clinical practice. This  
26 limits the quantity and complexity of data it is feasible to collect. Specific data  
27 regarding antibiotic therapy for RIF pain and presenting symptoms outside of those  
28 included within risk scores will not be collected.  
29  
30  
31  
32  
33  
34  
35  
36  
37  
38  
39  
40  
41  
42  
43  
44  
45  
46  
47  
48  
49  
50  
51  
52  
53  
54  
55  
56  
57  
58  
59  
60

## Introduction

Right iliac fossa (RIF) pain is one of the commonest presentations to acute general surgical services<sup>1</sup>. Causes include appendicitis, other gastrointestinal, urological, gynaecological, vascular, and musculoskeletal pathologies. Given this range of potential pathologies, variation in presentation and similarity to other conditions, particularly ovarian pathologies in women of reproductive age, diagnosing appendicitis can be a challenge. Traditionally, surgeons have relied upon clinical history, examination findings and basic laboratory investigations for diagnosis. Objective stratifiers such as the Appendicitis Inflammatory Response (AIR)<sup>2</sup> and Alvarado scores<sup>3</sup> have been developed to combat this diagnostic uncertainty; yet, these were derived from small retrospective cohorts, are poorly validated and not widely used<sup>4</sup>.

Since delayed appendicectomy is associated with increased risk of complications, prompt diagnosis and treatment is essential<sup>5</sup>. Diagnostic uncertainty, coupled with the risks of diagnostic delay, has led to surgeons having a low threshold for operating on patients with equivocal symptoms resulting in high rates of negative appendicectomy: a national audit in 2012 found the UK's negative appendicectomy rate to be 20.6%<sup>6</sup>.

Recent guidelines stipulate that appendicectomy should be performed laparoscopically unless this is contraindicated<sup>7,8</sup> (Table 1). However, in 2012 one third of patients underwent open appendicectomy<sup>6</sup>. Unlike laparoscopic surgery, open procedures typically commit the surgeon to proceed to appendicectomy even if the appendix is found to be macroscopically normal once visualised.

1  
2 This study will test the hypothesis that, associated with increased take-up of laparoscopy,  
3  
4 the negative appendectomy rate will have decreased since 2012. In order to inform the  
5  
6 implementation of recent guidelines which mandate risk stratification of patients with RIF  
7  
8 pain, this study will also validate the AIR and Alvarado scores in a large, prospective,  
9  
10 international cohort<sup>7,8</sup>.  
11  
12  
13  
14  
15  
16  
17  
18  
19  
20  
21  
22  
23  
24  
25  
26  
27  
28  
29  
30  
31  
32  
33  
34  
35  
36  
37  
38  
39  
40  
41  
42  
43  
44  
45  
46  
47  
48  
49  
50  
51  
52  
53  
54  
55  
56  
57  
58  
59  
60

For peer review only



## Methods and analysis

This prospective, observational, multicentre study will be coordinated by trainee-led research networks which have been described previously<sup>9,10</sup>.

### *Aims and objectives*

The primary aim of this study is to determine the negative appendectomy rate. The secondary aims of this study are to determine the rate of laparoscopy for appendectomy and to validate the AIRS and Alvarado scores for acute appendicitis. A centre survey will profile local policy and service delivery for management of patients presenting with RIF pain.

### *Patients and centres*

Any hospital that offers acute general surgical services will be eligible to participate. Local collaborators at each centre will prospectively collect data during any of four, two-week long study periods, on consecutive patients referred to the general or paediatric surgery units with RIF pain or suspected appendicitis. Patients will be identified prospectively via hospital computer systems, handover lists, and by the clinical surgical team. Patients who are pregnant, have had abdominal surgery in the preceding 90 days, or have had previous appendectomy, right hemi-colectomy, or total colectomy will be excluded (Figure 1). Variables required to calculate the AIRS and Alvarado scores will be collected at time of presentation to the surgical unit.

### *Follow up*

Patients will be followed throughout their admission to determine their treatment pathway and length of stay. Data will also be collected on histology and readmission rates, for both

1 the operated and non-operated groups, within 30 days. Collaborators will access  
2 electronic records, emergency department and theatre systems, and patient notes to  
3 collect data. No patient identifiable information will be collected.  
4  
5  
6  
7  
8  
9

#### 10 *Centre survey*

11 A consultant surgeon at each participating centre will complete a short questionnaire  
12 regarding the guidelines, protocols and resources available for the investigation and  
13 management of RIF pain in their hospital (Table 2).  
14  
15  
16  
17  
18  
19

#### 20 *Project management and recruitment*

21 The RIFT steering committee will be responsible for protocol development, data collection  
22 and data analysis. A structured system of national, regional and local leadership has been  
23 created to coordinate the RIFT study. National leads will oversee participation in RIFT  
24 within their countries through networks including the West Midlands Research  
25 Collaborative (WMRC), UK National Surgical Research Collaborative (NRC) and Italian  
26 Surgical Research Group (ItSurg), as well as through social media platforms<sup>11</sup>. Regional  
27 leads will recruit, advise and ensure the correct approvals are in place for each hospital  
28 within their region. Local leads will oversee data collection in their hospital, ensuring  
29 adherence to local governance protocols and continuous data collection across the 2-  
30 week periods. Up to three collaborators per 2-week period, per hospital, will be recruited to  
31 participate. A secure server running the 'Research Electronic Data Capture' (REDCap,  
32 Boston, MA) web application hosted by the University of Birmingham, UK, will be used to  
33 collect and securely store data.  
34  
35  
36  
37  
38  
39  
40  
41  
42  
43  
44  
45  
46  
47  
48  
49  
50  
51

#### 52 *Sample size and statistical analysis*

1  
2 Based on pilot studies across four centres, we estimate that each centre will capture  
3  
4 approximately 10 patients with RIF pain per week. The steering committee has received  
5  
6 expressions of interest in participation from over 150 centres. It is estimated that around  
7  
8 75 centres will participate during each period. This would result in approximately 6000  
9  
10 patients being included in RIFT across the four data collection periods. It is anticipated that  
11  
12 around 20% (1200 patients) will undergo appendicectomy.  
13  
14

15  
16  
17 Data will be reported in accordance with STROBE (Strengthening The Reporting of  
18  
19 Observational studies in Epidemiology) guidelines for observational studies<sup>12</sup>. Differences  
20  
21 between patient, disease and operative specific factors will be tested using Student's t-test  
22  
23 for continuous data (p-value) and Chi-square for categorical data (reported as Chi-square,  
24  
25 p-value). An  $\alpha$ -level of 0.05 will be accepted as significant.  
26  
27  
28

29  
30  
31 Pre-planned analyses will include, and are not limited to: (1) variation in the negative  
32  
33 appendicectomy and laparoscopy rates across participating centres and countries; (2)  
34  
35 predictive value of AIR and Alvarado risk scores; (3) variation in management of RIF pain  
36  
37 for patients with low-, medium- and high-risk of appendicitis, from both adult and paediatric  
38  
39 populations; (4) delay to presentation and delay to surgery with relation to rates of  
40  
41 complex appendicitis. Sensitivity, specificity, positive predictive value and negative  
42  
43 predictive value will be calculated for clinical risk scores. A panelled multi-level,  
44  
45 multivariate, binary logistic regression model, including centre as a random effect, will be  
46  
47 used to assess the association of clinical risk scores with negative appendicectomy. A  
48  
49 similar multilevel model will be used to assess the association between delay to surgery  
50  
51 and complex appendicitis. The model fit will be tested with Area under the Curve analysis,  
52  
53 using Somer's test to derive a C-statistic.  
54  
55  
56  
57  
58  
59  
60

### *Ethics*

In the UK the online National Research Ethics Service (NRES) decision tool (<http://www.hra-decisiontools.org.uk>) confirmed that RIFT does not require research ethics approval in the UK. The RIFT study will be registered as a clinical audit in each participating UK centre. National leads in other countries will oversee appropriate registration and study approval, which may include completing full ethical review. Local investigators will be responsible for ensuring local approvals are in place, and will be required to demonstrate this in order to gain access to the online data collection tool.

### *Reporting and dissemination*

A consultant surgeon will facilitate presentation of local study results at a governance meeting at each participating centre. Peer-reviewed publications will be published under corporate authorship including 'RIFT Study Group' and 'West Midlands Research Collaborative'.

### **Discussion**

The RIFT study will be a large, multicentre, international, prospective observational study of undifferentiated patients presenting with RIF pain, and suspected appendicitis. By utilising a protocol driven, pre-planned data collection tool and analysis plan, this study will ensure high data quality, whilst minimising the burden on participating centres.

1 The 2012 national appendicectomy audit found a significant variation in management of  
2 appendicitis across the UK<sup>6</sup>. In light of recent guidelines stipulating that appendicectomy in  
3 adults should be performed laparoscopically unless contraindicated<sup>7,8</sup>, the RIFT study  
4 offers the opportunity to examine health system-level quality improvement in the delivery  
5 of laparoscopic appendicectomy five years on from the 2012 study. By mapping real-life  
6 patient pathways for investigation and management of RIF pain, RIFT will importantly  
7 determine whether any increase in laparoscopy has been associated with a decrease in  
8 the rate of negative appendicectomy.  
9

10 Validation of the AIR and Alvarado scores in a large international cohort will determine the  
11 suitability of using these to stratify patients in to low-, medium-, and high-risk groups for  
12 appendicitis, as envisaged by recent guidelines<sup>7</sup>. If these risk scores are found to have  
13 poor prognostic properties, it may be possible to develop and validate a new score based  
14 on the RIFT dataset. Risk scores may aid junior clinicians' decision making and may have  
15 a role in avoiding unnecessary operations, reducing the negative appendicectomy rate,  
16 and improving patient safety<sup>4</sup>. Furthermore, validated risk scores may be particularly  
17 useful in low resource settings with limited access to diagnostic investigations.  
18

19 The UK National Surgical Research Collaborative's member groups have run trainee-led  
20 collaborative studies across 99% of the UK's surgical units<sup>10</sup>, delivering large, prospective  
21 studies<sup>6</sup>. However, as trainees complete their training and become consultants, the  
22 sustainability of postgraduate trainee research collaboratives will be dependent on  
23 engaging new junior trainees each year. Whereas previous studies undertaken by surgical  
24 research collaboratives have been targeted at either senior trainees or medical students,  
25 RIFT is the first study aimed at junior specialty trainees. A surrogate marker for the  
26  
27  
28  
29  
30  
31  
32  
33  
34  
35  
36  
37  
38  
39  
40  
41  
42  
43  
44  
45  
46  
47  
48  
49  
50  
51  
52  
53  
54  
55  
56  
57  
58  
59  
60

1 success of RIFT will therefore be successful engagement and mentoring of junior trainees  
2  
3 in collaborative research.  
4  
5  
6  
7  
8  
9

### 10 *Limitations*

11  
12 The RIFT Study Group has made specific efforts to minimise the risk of inherent bias in  
13 this observational study. Data will be collected prospectively and patient pathways  
14 followed proactively by collaborators, who will often be the frontline clinicians responsible  
15 for the patients' care. Unlike most previous studies which have focused specifically on  
16 patients who undergo appendicectomy, RIFT will include all patients presenting with RIF  
17 pain or suspected appendicitis, to general surgical services. Nonetheless, since these  
18 patients will have already been triaged by emergency department or general practice  
19 doctors, this is likely to be a selected group who are more likely to have appendicitis than  
20 patients with truly undifferentiated presentations.  
21  
22  
23  
24  
25  
26  
27  
28  
29  
30  
31  
32  
33  
34

35 Given the large volume of patients presenting with RIF pain and the short inpatient stays  
36 that most patients have, reliably identifying all eligible patients will be more challenging  
37 than in previous studies run by trainee collaboratives. However, pre-planned validation by  
38 an independent investigator will ensure that case ascertainment rates are monitored. This  
39 will also mitigate any risk of reporting bias from clinicians declining to submit details of  
40 patients that have been misdiagnosed at their centre.  
41  
42  
43  
44  
45  
46  
47  
48  
49

50 Due to the pragmatic 'snap-shot' nature of this study, carried out by practicing clinicians,  
51 there is a limit to the depth and breadth of data points included. For instance, the study will  
52 not collect the length and nature of peri-operative antibiotic treatment (Table 1).  
53  
54  
55  
56  
57  
58  
59  
60

1  
2 Furthermore, follow up is limited to 30 days after the index hospital admission. It is  
3 possible that a proportion of patients initially discharged having not undergone  
4 appendicectomy may subsequently be readmitted and undergo surgery either at other  
5 hospitals or beyond the 30 day follow up.  
6  
7  
8  
9

## 10 11 12 **Conclusion**

13  
14 The RIFT study is a protocol-driven, international, multicentre prospective observational  
15 study using a 'snap-shot' methodology, in line with the UK surgical research collaborative  
16 model. The study aims to describe the current variation in investigation and management  
17 of right iliac fossa pain in several European countries, aligned to contemporaneous  
18 specialty guidelines.  
19  
20  
21  
22  
23  
24  
25  
26  
27  
28  
29  
30  
31  
32  
33  
34  
35  
36  
37  
38  
39  
40  
41  
42  
43  
44  
45  
46  
47  
48  
49  
50  
51  
52  
53  
54  
55  
56  
57  
58  
59  
60

**Authors' contributions:**

Conception and writing of protocol: Jacob H Matthews, Gabriella L Morley, Shivam Bhanderi, Sarus Jain, Imran Mohamed, Thuvarahan Amuthalingam, Robert Tyler, James C Glasbey, Richard Wilkin, Dmitri Nepogodiev, Aneel Bhangu

Participation in collaborator meeting, development of study concept, and editing of protocol: Jacob H Matthews, Gabriella L Morley, Shivam Bhanderi, Sarus Jain, Imran Mohamed, Thuvarahan Amuthalingam, Robert Tyler, James C Glasbey, Ewen Griffiths, Thomas Pinkney, Oliver Gee, Dion Morton, Francesco Pata, Gianluca Pellino, Valeria Farina, Laura Gavagna, Pietro Maria Naccari, Sandro Pasquali, Bruno Sensi, Alessandro Sgrò, Andrea Simioni, Ruth Blanco-Colino, Matteo Frasson, Antonio Sampaio Soares, Natalie Blencowe, Will Bolton, Stephen Chapman, Catherine Bradshaw, Grant Harris, James Haddow, Kapil Sahnun, John Mason, Scott McCain, David Milgrom, Saleem Noor Mohamed, James O'Brien, Jack Pearce, Mohammed Rabie, Gaël R. Nana, Panchali Sarmah, Nigel Jamieson, Richard Wilkin, Aneel Bhangu, Dmitri Nepogodiev.

Guarantor: Aneel Bhangu,

All authors read and approved the final manuscript.

Funding statement: None to declare.

Competing interests: None to declare.

Data sharing statement: All data from this study will be available on request.



## References

1. Royal College of Surgeons and Association of Surgeons of Great Britain and Ireland. Commissioning guide 2014: emergency general surgery (acute abdominal pain). London. 2014
2. Andersson M, Andersson RE. The appendicitis inflammatory response score: a tool for the diagnosis of acute appendicitis that outperforms the Alvarado score. *World J Surg* 2008; 32:1843–1849
3. Alvarado A. A practical score for the early diagnosis of acute appendicitis. *Ann Emerg Med* 1986;15:557–564
4. Kularatna M, Lauti M, Haran C, *et al.* Clinical Prediction Rules for Appendicitis in Adults: Which Is Best? *World J Surg* 2017:1-13
5. Bhangu A. Safety of short, in-hospital delayers before surgery for acute appendicitis: multicenter cohort study, systematic review, and meta-analysis. *Ann Surg* 2014;259:894-903
6. National Surgical Research Collaborative. Multicentre observational study of performance variation in provision and outcome of emergency appendicectomy. *Br J Surg* 2013 ;100:1240–52
7. Di Saverio S, Birindelli A, Kelly MD, *et al.* WSES Jerusalem guidelines for diagnosis and treatment of acute appendicitis. *World Journal of Emergency Surgery : WJES.* 2016;11:34.
8. Gorter RR, Eker HH, Gorter-Stam MAW, *et al.* Diagnosis and management of acute appendicitis. EAES consensus development conference 2015. *Surgical Endoscopy* 2016;30:4668-4690.
9. Bhangu A, Koliass AG, Pinkney T, Hall NJ, Fitzgerald JE *et al.* Surgical research collaboratives in the UK. *Lancet* 2013;382:1091–2.
10. Nepogodiev D, Chapman SJ, Koliass AG, Fitzgerald JE, Lee M, Blencowe NS. (On behalf of the National Surgical Research Collaborative). The impact of research collaboratives in the UK. *Lancet Gastroenterology & Hepatology* 2017;2(4):247-248.
11. Khatri C, Chapman SJ, Glasbey J, *et al.* Social media and internet driven study recruitment: evaluating a new model for promoting collaborator engagement and participation. *PLoS ONE* 2015;10: e0118899.
12. Von Elm E, Altman DG, Egger M, Pocock SJ, Gøtzsche PC, Vandenbroucke JP, Strobe Initiative. The Strengthening the Reporting of Observational Studies in Epidemiology (STROBE) Statement: guidelines for reporting observational studies. *International Journal of Surgery* 2014 Dec 31;12(12):1495-9.

## Appendix 1

### RIFT Study Group

**Steering Committee:** Jacob H Matthews<sup>‡</sup>, Gabriella L Morley, Shivam Bhanderi, Sarus Jain, Imran Mohamed, Thuvarahan Amuthalingam, Robert Tyler, James C Glasbey, Richard Wilkin, Dmitri Nepogodiev, Aneel Bhangu (senior author)

**Advisory Group:** Ewen Griffiths, Thomas Pinkney, Oliver Gee, Dion Morton

**Italian Surgical Research Group:** Francesco Pata, Gianluca Pellino, Valeria Farina, Laura Gavagna, Pietro Maria Naccari, Sandro Pasquali, Bruno Sensi, Alessandro Sgrò, Andrea Simioni

**RIFT Spain and Portugal Leads:** Ruth Blanco-Colino, Matteo Frasson, Antonio Sampaio Soares

**RIFT UK Regional Leads:** Natalie Blencowe (Severn & Peninsula Audit and Research Collaborative\*); Will Bolton, Stephen Chapman (Yorkshire Surgical Research Collaborative\*); Catherine Bradshaw (Paediatric Surgery Trainee Research Network\*); Grant Harris (Northern Surgical Trainees Research Association\*); James Haddow, Kapil Sahnun (London Surgical Research Group\*); John Mason (Oxford Surgical Collaborative for Audit and Research\*); Scott McCain (Northern Ireland Surgical Research Collaborative\*); David Milgrom (North West Research Collaborative\*); Saleem Noor Mohamed (West Midlands Research Collaborative\*); James O'Brien (East of England Surgical Research Group\*); Jack Pearce (Welsh Barbers Surgical Research Group\*); Mohammed Rabie (Kent and Medway); Gaël R. Nana, Panchali Sarmah (East Midlands Surgical Academic Network\*), Nigel Jamieson (Scotland).

\*Steering Committee Chairman

\*Corporate authorships of UK trainee surgical research collaboratives, also PubMed citable.

| Society | Statement | Guidance statement | Captured within |
|---------|-----------|--------------------|-----------------|
|---------|-----------|--------------------|-----------------|

For peer review only

**Table 1:**

A complete compilation and comparison of the World Society of Emergency surgery's (WSES 2016) and the European Association of Endoscopic Surgery's (EAES 2016) guidance on the investigation and management of appendicitis. Those statements captured within the RIFT study's data collection have been highlighted. The EAES guidance is split into statements (S) and recommendations (R) under three sections; pre-operative care, operative managements and after care. The WSES guidance is numbered and listed under the sections described in the table.

|                                                          | Number       |                                                                                                                                                                                                                                                                                                      | the RIFT Study |
|----------------------------------------------------------|--------------|------------------------------------------------------------------------------------------------------------------------------------------------------------------------------------------------------------------------------------------------------------------------------------------------------|----------------|
| 1) Diagnostic efficiency of clinical scoring systems     |              |                                                                                                                                                                                                                                                                                                      |                |
| EAES                                                     | Pre-Op R1    | The combined variables of clinical assessment and biochemical testing in the Alvarado score should be used to determine the likelihood of appendicitis.                                                                                                                                              | Yes            |
| WSES                                                     | 1.1          | The Alvarado score (with cutoff score <5) is sufficiently sensitive to exclude acute appendicitis.                                                                                                                                                                                                   | Yes            |
| WSES                                                     | 1.2          | The Alvarado score is not sufficiently specific in diagnosing acute appendicitis.                                                                                                                                                                                                                    | Yes            |
| WSES                                                     | 1.3          | An ideal (high sensitivity and specificity), clinically applicable, diagnostic scoring system/clinical rule remains outstanding. This remains an area for future research                                                                                                                            | Yes            |
| 2) Role of imaging                                       |              |                                                                                                                                                                                                                                                                                                      |                |
| WSES                                                     | 2.1          | In patients with suspected appendicitis a tailored individualised approach is recommended, depending on disease probability, sex and age of the patient                                                                                                                                              | Yes            |
| WSES                                                     | 2.2          | Imaging should be linked to Risk Stratification such as AIR or Alvarado score                                                                                                                                                                                                                        | Yes            |
| WSES                                                     | 2.3          | Low risk patients being admitted to hospital and not clinically improving or reassessed score could have appendicitis ruled-in or out by abdominal CT                                                                                                                                                | Yes            |
| WSES                                                     | 2.4          | Intermediate risk classification identifies patients likely to benefit from observation and systematic diagnostic imaging.                                                                                                                                                                           | Yes            |
| WSES                                                     | 2.5          | High risk patients (younger than 60 years old) may not require preoperative imaging.                                                                                                                                                                                                                 | Yes            |
| EAES                                                     | Pre-Op R2    | We recommend that ultrasound should be performed as a first level diagnostic imaging although it has lower diagnostic value in case radiological confirmation is desirable.                                                                                                                          | Yes            |
| WSES                                                     | 2.6          | US Standard reporting templates for ultrasound and US three step sequential positioning may enhance over accuracy.                                                                                                                                                                                   |                |
| EAES                                                     | Pre-Op R3    | If after ultrasound the diagnosis of appendicitis is not confirmed nor ruled out we suggest that additional imaging studies (either a CT or MRI) should be performed.                                                                                                                                | Yes            |
| EAES                                                     | Pre-Op R4    | In obese patients, a CT or MRI is more accurate than ultrasonography; In case of diagnostic doubt we recommend a CT or MRI in these specific patients.                                                                                                                                               |                |
| EAES                                                     | Pre-Op R5    | In pregnant patients radiation should be avoided; In case of diagnostic doubt we recommend an MRI in these specific patients.                                                                                                                                                                        |                |
| WSES                                                     | 2.7          | MRI is recommended in pregnant patients with suspected appendicitis, if this resource is available                                                                                                                                                                                                   |                |
| EAES                                                     | Pre-Op R6    | In children radiation should be avoided; In case of diagnostic doubt we recommend an MRI in these specific patients.                                                                                                                                                                                 | Yes            |
| 3) Nonoperative treatment for uncomplicated appendicitis |              |                                                                                                                                                                                                                                                                                                      |                |
| WSES                                                     | 3.1          | Antibiotic therapy can be successful in selected patients with uncomplicated appendicitis who wish to avoid surgery and accept the risk up to 38 % recurrence.                                                                                                                                       | Yes            |
| EAES                                                     | Pre-Op R7    | Non-operative treatment (with antibiotics) of uncomplicated appendicitis in adults is not suggested as high quality evidence of superiority is still lacking.                                                                                                                                        | Yes            |
| WSES                                                     | 3.2          | Current evidence supports initial intravenous antibiotics with subsequent conversion to oral antibiotics.                                                                                                                                                                                            |                |
| WSES                                                     | 3.3          | In patients with normal investigations and symptoms unlikely to be appendicitis but which do not settle; 1) Cross-sectional imaging is recommended before surgery; 2) Laparoscopy is the surgical approach of choice; and 3) There is inadequate evidence to recommend a routine approach at present | Yes            |
| 4) Timing of appendectomy and in-hospital delay          |              |                                                                                                                                                                                                                                                                                                      |                |
| WSES                                                     | 4.1          | Short, in-hospital surgical delay up to 12/24 h is safe in uncomplicated acute appendicitis and does not increase complications and/or perforation rate.                                                                                                                                             | Yes            |
| WSES                                                     | 4.2          | Surgery for uncomplicated appendicitis can be planned for next available list minimizing delay wherever possible (patient comfort etc.).                                                                                                                                                             | Yes            |
| EAES                                                     | Operative R1 | We recommend that surgery is performed as soon as feasible after diagnosis.                                                                                                                                                                                                                          | Yes            |
| 5) Surgical treatment                                    |              |                                                                                                                                                                                                                                                                                                      |                |
| WSES                                                     | 5.1.1        | Laparoscopic appendectomy should represent the first choice where laparoscopic equipment and skills are available, since it offers clear advantages in terms of less pain, lower incidence of SSI, decreased LOS, earlier return to work and overall costs.                                          | Yes            |
| EAES                                                     | Pre-Op       | Laparoscopic appendectomy is recommended as the procedure of choice in adults with                                                                                                                                                                                                                   | Yes            |

|      |               |                                                                                                                                                                                                                                                                                |     |
|------|---------------|--------------------------------------------------------------------------------------------------------------------------------------------------------------------------------------------------------------------------------------------------------------------------------|-----|
|      | R8            | uncomplicated acute appendicitis.                                                                                                                                                                                                                                              |     |
| WSES | 5.1.2         | Laparoscopy offers clear advantages and should be preferred in obese patients, older patients and patients with comorbidities                                                                                                                                                  | Yes |
| EAES | Pre-Op R11    | Laparoscopic appendectomy is recommended as the procedure of choice in obese patients with acute appendicitis.                                                                                                                                                                 | Yes |
| EAES | Pre-Op R14    | Laparoscopic appendectomy is recommended as the procedure of choice in patients over 65 years of age.                                                                                                                                                                          | Yes |
| WSES | 5.1.3         | Laparoscopy is feasible and safe in young male patients although no clear advantages can be demonstrated in such patients.                                                                                                                                                     | Yes |
| WSES | 5.1.4         | Laparoscopy should not be considered as a first choice over open appendectomy in pregnant patients                                                                                                                                                                             |     |
| EAES | Pre-Op R12    | Laparoscopic appendectomy is suggested as the procedure of choice in pregnant patients with acute appendicitis. It should even be considered in the third trimester.                                                                                                           |     |
| WSES | 5.1.5         | No major benefits have also been observed in laparoscopic appendectomy in children, but it reduces hospital stay and overall morbidity                                                                                                                                         | Yes |
| EAES | Pre-Op R13    | Laparoscopic appendectomy is suggested as the procedure of choice in children with acute appendicitis and an indication for appendectomy.                                                                                                                                      | Yes |
| WSES | 5.1.6         | In experienced hands, laparoscopy is more beneficial and cost-effective than open surgery for complicated appendicitis                                                                                                                                                         | Yes |
| EAES | Pre-Op R9     | Laparoscopic appendectomy is suggested as the procedure of choice in patients with perforated appendicitis.                                                                                                                                                                    | Yes |
| EAES | After Care R2 | We suggest the use of local anesthetic for subcutaneous and muscular infiltration of incision sites prior to incision.                                                                                                                                                         |     |
| EAES | Operative R6  | Open: supine, one or both arms out, surgeon at the right side, assistant on the left side. Laparoscopic: supine, right arm out, left arm along the body, surgeon and assistant on the left side.                                                                               |     |
| EAES | Operative R7  | The consensus held a preference for open access to the peritoneal cavity because of rare but serious complications associated with the Verees needle.                                                                                                                          |     |
| EAES | Operative R8  | Based upon the literature no recommendation can be made which trocars should be used and their placement. This should be left at the surgeon's discretion. Three-port technique should be standard. Single port approaches can be used by surgeons with sufficient experience. |     |
| WSES | 5.2           | Peritoneal irrigation does not have any advantages over suction alone in complicated appendicitis                                                                                                                                                                              |     |
| WSES | 5.3.1         | There are no clinical differences in outcomes, LOS and complications rates between the different techniques described for mesentery dissection (monopolar electrocoagulation, bipolar energy, metal clips, endoloops, Ligasure, Harmonic Scalpel etc.).                        |     |
| WSES | 5.3.2         | Monopolar electrocoagulation and bipolar energy are the most cost-effective techniques, even if more experience and technical skills is required to avoid potential complications (e.g. bleeding) and thermal injuries.                                                        |     |
| WSES | 5.4.1         | There are no clinical advantages in the use of endostapler over endoloops for stump closure for both adults and children                                                                                                                                                       |     |
| EAES | Operative R10 | The use of stapler or suturing is recommended over clips or endoloops when the appendix base is inflamed, necrotic or perforated. The use of alternative measures to secure the appendiceal stump in this case may be insufficient.                                            |     |
| EAES | After Care R4 | In order to prevent stump appendicitis, it is suggested that the appendiceal stump should be no longer than 0.5cm. Timely diagnosis allows laparoscopic stump resection. Delayed diagnosis may require extended bowel resection.                                               |     |
| WSES | 5.4.2         | Endoloops might be preferred for lowering the costs when appropriate skills/learning curve are available                                                                                                                                                                       |     |
| WSES | 5.4.3         | There are no advantages of stump inversion over simple ligation, either in open or laparoscopic surgery                                                                                                                                                                        |     |
| WSES | 5.5.1         | Drains are not recommended in complicated appendicitis in paediatric patients                                                                                                                                                                                                  |     |
| EAES | Operative R4  | It is suggested that there is no indication for routine postoperative nasogastric tube placement in children or adults.                                                                                                                                                        |     |
| EAES | Operative R11 | It is recommended that extraction of the appendix should avoid direct contact of the appendix and the abdominal wall. There are several methods of achieving this and there is no evidence                                                                                     |     |

|                                                                                             |               |                                                                                                                                                                                                                                                                                                                                  |     |
|---------------------------------------------------------------------------------------------|---------------|----------------------------------------------------------------------------------------------------------------------------------------------------------------------------------------------------------------------------------------------------------------------------------------------------------------------------------|-----|
|                                                                                             |               | supporting one above the other.                                                                                                                                                                                                                                                                                                  |     |
| EAES                                                                                        | Operative R5  | It is suggested that there is no indication for routine postoperative catheter placement in children or adults.                                                                                                                                                                                                                  |     |
| WSES                                                                                        | 5.5.2         | In adult patients, drain after appendectomy for perforated appendicitis and abscess/peritonitis should be used with judicious caution, given the absence of good evidence from the literature. Drains did not prove any efficacy in preventing intraabdominal abscess and seem to be associated with delayed hospital discharge. |     |
| EAES                                                                                        | Operative R12 | In general, meticulous suction of intra-peritoneal fluid or collections is suggested; the philosophy should be: "leave no pus behind". Routine use of drains in appendectomy is not recommended.                                                                                                                                 |     |
| WSES                                                                                        | 5.6           | Delayed primary skin closure does not seem beneficial for reducing the risk of SSI and increase LOS in open appendectomies with contaminated/dirty wounds                                                                                                                                                                        |     |
| EAES                                                                                        | Operative R13 | Primary wound closure is recommended for all cases of open appendectomy.                                                                                                                                                                                                                                                         |     |
| EAES                                                                                        | Operative S1  | Various reasons exist to convert LA. However, no recommendation about when to convert can be given. It should be stated that conversion to open surgery is not regarded as a complication.                                                                                                                                       | Yes |
| EAES                                                                                        | After Care R3 | There is no reason to restrict the postoperative diet after an uncomplicated appendectomy.                                                                                                                                                                                                                                       |     |
| 6) Scoring systems for intraoperative grading of appendicitis and their clinical usefulness |               |                                                                                                                                                                                                                                                                                                                                  |     |
| WSES                                                                                        | 6.1           | The incidence of unexpected findings in appendectomy specimens is low but the intraoperative diagnosis alone is insufficient for identifying unexpected disease. From the current available evidence, routine histopathology is necessary                                                                                        | Yes |
| EAES                                                                                        | After Care R1 | It is recommended to send all appendices to the pathology department routinely and the operated will review the results.                                                                                                                                                                                                         | Yes |
| EAES                                                                                        | Operative R15 | It is suggested that definitive treatment of a suspected malignancy will depend on final histological and staging information after initial treatment of the operative findings and may require further surgery or adjunct treatment.                                                                                            |     |
| WSES                                                                                        | 6.2           | There is a lack of validated system for histological classification of acute appendicitis and controversies exist on this topic.                                                                                                                                                                                                 |     |
| WSES                                                                                        | 6.3           | Surgeon's macroscopic judgement of early grades of acute appendicitis is inaccurate                                                                                                                                                                                                                                              | Yes |
| WSES                                                                                        | 6.4           | If the appendix looks "normal" during surgery and no other disease is found in symptomatic patient, we recommend removal in any case.                                                                                                                                                                                            | Yes |
| EAES                                                                                        | Operative R9  | It is suggested to remove the "normal" appearing appendix when operating for suspected appendicitis when no other pathology is identified.                                                                                                                                                                                       | Yes |
| WSES                                                                                        | 6.5           | We recommend adoption of a grading system for acute appendicitis based on clinical, imaging and operative findings, which can allow identification of homogeneous groups of patients, determining optimal grade disease management and comparing therapeutic modalities                                                          |     |
| 7) Nonsurgical treatment for complicated appendicitis: abscess or phlegmone                 |               |                                                                                                                                                                                                                                                                                                                                  |     |
| WSES                                                                                        | 7.1           | Percutaneous drainage of a peri-appendiceal abscess, if accessible, is an appropriate treatment in addition to antibiotics for complicated appendicitis.                                                                                                                                                                         | Yes |
| WSES                                                                                        | 7.2           | Nonoperative management is a reasonable first line treatment for appendicitis with phlegmon or abscess                                                                                                                                                                                                                           | Yes |
| EAES                                                                                        | After Care R5 | Initial treatment of intra-abdominal abscess (IAA) is conservative with antibiotics. In some patients, this may need to be combined with radiological or surgical drainage.                                                                                                                                                      | Yes |
| EAES                                                                                        | Pre-Op R10    | Non-operative treatment is suggested as the procedure of choice for patients with an appendiceal mass in the absence of diffuse peritonitis. Data are lacking on the benefits of interval appendectomy.                                                                                                                          | Yes |
| WSES                                                                                        | 7.3           | Operative management of acute appendicitis with phlegmon or abscess is a safe alternative to nonoperative management in experienced hands                                                                                                                                                                                        | Yes |
| EAES                                                                                        | Operative R14 | It is recommended to treat an inflammatory mass conservatively. We recommend that when encountered during laparoscopy, refrain from appendectomy. During follow-up: additional imaging is advised. Data are lacking on the benefits of interval appendectomy.                                                                    |     |
| WSES                                                                                        | 7.4           | Interval appendectomy is not routinely recommended both in adults and children.                                                                                                                                                                                                                                                  | Yes |
| WSES                                                                                        | 7.5           | Interval appendectomy is recommended for those patients with recurrent symptoms.                                                                                                                                                                                                                                                 | Yes |
| WSES                                                                                        | 7.6           | Colonic screening should be performed in those patients with appendicitis treated non-operatively if >40y/o                                                                                                                                                                                                                      |     |

| 8) Preoperative and Postoperative Antibiotics |               |                                                                                                                                                                                                          |  |
|-----------------------------------------------|---------------|----------------------------------------------------------------------------------------------------------------------------------------------------------------------------------------------------------|--|
| WSES                                          | 8.1           | In patients with acute appendicitis preoperative broad-spectrum antibiotics are always recommended                                                                                                       |  |
| EAES                                          | Operative R2  | Prophylactic antibiotics are recommended in appendectomy in adults.                                                                                                                                      |  |
| EAES                                          | Operative R3  | Prophylactic antibiotics are recommended in appendectomy in children.                                                                                                                                    |  |
| WSES                                          | 8.2           | For patients with uncomplicated appendicitis, postoperative antibiotics are not recommended                                                                                                              |  |
| EAES                                          | After Care S1 | Evidence for duration of administration of postoperative antibiotics is lacking.                                                                                                                         |  |
| EAES                                          | After Care S2 | There is no evidence of routine use of postoperative antibiotics in uncomplicated appendicitis.                                                                                                          |  |
| EAES                                          | After Care R6 | In complicated appendicitis, postoperative antibiotics are recommended.                                                                                                                                  |  |
| WSES                                          | 8.3           | In patients with complicated acute appendicitis, postoperative, broad-spectrum antibiotics are always recommended                                                                                        |  |
| WSES                                          | 8.4           | Although discontinuation of antimicrobial treatment should be based on clinical and laboratory criteria such as fever and leucocytosis, a period of 3–5 days for adult patients is generally recommended |  |

|                                                    | Data Criteria                                                                                                                                  | Options                                                                                                                                                                                                                 |
|----------------------------------------------------|------------------------------------------------------------------------------------------------------------------------------------------------|-------------------------------------------------------------------------------------------------------------------------------------------------------------------------------------------------------------------------|
| <i>Centre details</i>                              |                                                                                                                                                |                                                                                                                                                                                                                         |
| 1(a)                                               | Does your unit care for?                                                                                                                       | <ul style="list-style-type: none"> <li>▪ Adults only</li> <li>▪ Children only</li> <li>▪ Adults and children</li> </ul>                                                                                                 |
| 2                                                  | Does your hospital have an on-site gynaecology service?                                                                                        | <ul style="list-style-type: none"> <li>▪ Yes</li> <li>▪ No</li> </ul>                                                                                                                                                   |
| 3                                                  | Does your centre have 'review clinic' slots for patients to return for further assessment/imaging the following day if a diagnosis is unclear? | <ul style="list-style-type: none"> <li>▪ Yes – with ultrasound and clinical review</li> <li>▪ Yes – clinical review only</li> <li>▪ No</li> </ul>                                                                       |
| 4(a)                                               | How many <b>consultants</b> will be "on call" during the 2 week study period?                                                                  | Number =                                                                                                                                                                                                                |
| 4(b)                                               | How many consultant general surgeons work at your centre?                                                                                      | Number =                                                                                                                                                                                                                |
| 4 (c)                                              | Is there a <b>dedicated</b> registrar based on SAU to review patients?                                                                         | <ul style="list-style-type: none"> <li>▪ Yes – 24/7</li> <li>▪ Yes – During the day</li> <li>▪ No – One registrar splits time between theatre and SAU</li> </ul>                                                        |
| 5                                                  | At weekends, is ultrasound available?                                                                                                          | <ul style="list-style-type: none"> <li>▪ Yes</li> <li>▪ No</li> </ul>                                                                                                                                                   |
| 6(a)                                               | At weekends, is CT available?                                                                                                                  | <ul style="list-style-type: none"> <li>▪ Equivalent to weekday service</li> <li>▪ Reduced service but available for urgent surgical requests</li> <li>▪ Not available</li> </ul>                                        |
| 6(b)                                               | At night, is CT available?                                                                                                                     | <ul style="list-style-type: none"> <li>▪ Equivalent to weekday service</li> <li>▪ Reduced service but available for urgent surgical requests</li> <li>▪ Not available</li> </ul>                                        |
| <i>Does your centre have an agreed policy for:</i> |                                                                                                                                                |                                                                                                                                                                                                                         |
| 7                                                  | When to use appendicitis risk stratification scores?                                                                                           | <ul style="list-style-type: none"> <li>▪ Yes – use of score recommended</li> <li>▪ Yes – use of score discouraged</li> <li>▪ No policy in place</li> </ul>                                                              |
| 8                                                  | Which patients should have a CT scan prior to appendicectomy? (e.g. <i>diagnosis unclear, age &gt;50</i> )                                     | <ul style="list-style-type: none"> <li>▪ Yes – please detail</li> <li>▪ No policy in place</li> </ul>                                                                                                                   |
| 9                                                  | Whether some patients with appendicitis may be managed non-operatively?                                                                        | <ul style="list-style-type: none"> <li>▪ Yes –conservative management recommended for some patients; please detail</li> <li>▪ Yes – policy discourages conservative management</li> <li>▪ No policy in place</li> </ul> |
| 10                                                 | Whether laparoscopic or open appendicectomy should be routinely performed?                                                                     | <ul style="list-style-type: none"> <li>▪ Yes – open surgery recommended</li> <li>▪ Yes – laparoscopic surgery recommended</li> <li>▪ No policy in place</li> </ul>                                                      |
| 11                                                 | Whether a macroscopically normal looking appendix should be removed or left in situ?                                                           | <ul style="list-style-type: none"> <li>▪ Yes – removal recommended</li> <li>▪ Yes – recommend it be left in situ</li> <li>▪ No – no policy in place</li> </ul>                                                          |



1  
2  
3  
4  
5  
6  
7  
8  
9  
10  
11  
12  
13  
14  
15  
16  
17  
18  
19  
20  
21  
22  
23  
24  
25  
26  
27  
28  
29  
30  
31  
32  
33  
34  
35  
36  
37  
38  
39  
40  
41  
42  
43  
44  
45  
46  
47  
48  
49  
50  
51  
52  
53  
54  
55  
56  
57  
58  
59  
60

**Table 2: Centre Survey**

For peer review only

Figure 1: study flowchart

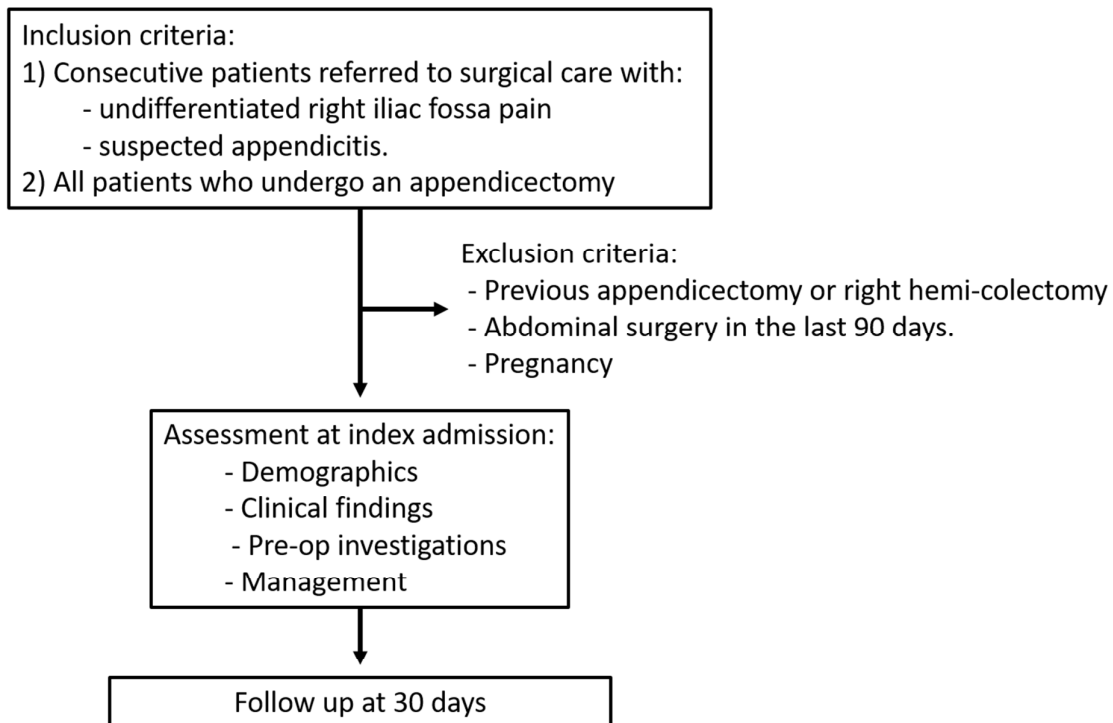

# BMJ Open

## Right Iliac Fossa Pain Treatment (RIFT) Study: Protocol for an international, multicentre, prospective observational study

|                                 |                                                                                                                                                                                                                                                                                      |
|---------------------------------|--------------------------------------------------------------------------------------------------------------------------------------------------------------------------------------------------------------------------------------------------------------------------------------|
| Journal:                        | <i>BMJ Open</i>                                                                                                                                                                                                                                                                      |
| Manuscript ID                   | bmjopen-2017-017574.R1                                                                                                                                                                                                                                                               |
| Article Type:                   | Protocol                                                                                                                                                                                                                                                                             |
| Date Submitted by the Author:   | 02-Jul-2017                                                                                                                                                                                                                                                                          |
| Complete List of Authors:       | on behalf of the West Midlands Research Collaborative, The Right Iliac Fossa Pain Treatment ; The West Midlands Research Collaborative, The department of Academic Surgery, University of Birmingham<br>Nepogodiev, Dmitri; University of Birmingham, Academic Department of Surgery |
| <b>Primary Subject Heading</b>: | Surgery                                                                                                                                                                                                                                                                              |
| Secondary Subject Heading:      | Evidence based practice, Emergency medicine                                                                                                                                                                                                                                          |
| Keywords:                       | appendicitis, appendectomy, right iliac fossa pain, Abdominal pain, SURGERY                                                                                                                                                                                                          |
|                                 |                                                                                                                                                                                                                                                                                      |

SCHOLARONE™  
Manuscripts

1  
2  
3 **Right Iliac Fossa Pain Treatment (RIFT) Study: Protocol for an international,**  
4 **multicentre, prospective observational study**  
5  
6  
7  
8  
9

10 The Right Iliac Fossa Pain Treatment (RIFT) Study Group on behalf of West Midlands Research  
11 Collaborative (WMRC)\*  
12  
13

14  
15  
16  
17 \*Collaborating members are listed in the Appendix 1  
18  
19

20  
21 Corresponding author:  
22

23 Dmitri Nepogodiev MBChB  
24

25 West Midlands Research Collaborative  
26

27 Academic Department of Surgery  
28

29 4<sup>th</sup> Floor, Heritage Building  
30

31 Mindelsohn Road  
32

33 Birmingham, B15 2TH,  
34

35 UK  
36

37  
38 Tel: +44 7776214335  
39

40 Email: d.nepogodiev@bham.ac.uk  
41  
42  
43  
44

45 Article type: Study Protocol  
46

47 Abstract word count: 281  
48

49 Word Count: 1943  
50

51 Keywords: Abdominal pain; surgery; appendicitis; appendicectomy; right iliac fossa pain.  
52  
53  
54  
55  
56  
57  
58  
59  
60

## Abstract

### Introduction

Patients presenting with right iliac fossa (RIF) pain are a common challenge for acute general surgical services. Given the range of potential pathologies, RIF pain creates diagnostic uncertainty and there is subsequent variation in investigation and management. Appendicitis is a diagnosis which must be considered in all patients with RIF pain, however over a fifth of patients undergoing appendectomy, in the UK, have been proven to have a histologically normal appendix (negative appendectomy). The primary aim of this study is to determine the contemporary negative appendectomy rate. The study's secondary aims are to determine the rate of laparoscopy for appendicitis and to validate the Appendicitis Inflammatory Response (AIR) and Alvarado prediction scores.

### Methods and Analysis

This multicentre, international prospective observational study will include all patients referred to surgical specialists with either RIF pain or suspected appendicitis. Consecutive patients presenting within two-week long data collection periods will be included. Centres will be invited to participate in up to 4 data collection periods between February and August 2017. Data will be captured using a secure online data management system. A centre survey will profile local policy and service delivery for management of RIF pain.

### Ethics and dissemination

Research ethics are not required for this study in the UK, as determined using the National Research Ethics Service decision tool. This study will be registered as a clinical audit in participating UK centres. National leads in countries outside the UK will oversee appropriate registration and study approval, which may include completing full ethical review. The study will be disseminated by trainee-led research collaboratives and through social media. Peer-

1  
2  
3 reviewed publications will be published under corporate authorship including 'RIFT Study Group'  
4  
5 and 'West Midlands Research Collaborative'.  
6  
7  
8

### 9 10 **Strengths and limitations of this study**

- 11 • This study will collect prospective, observational data on a large number of patients  
12 across Europe. A pre-planned validation process will verify case ascertainment and  
13 data accuracy.  
14
- 15 • The study uses the UK National Research Collaborative model to capture high-  
16 quality data whilst minimising the burden on participating centres.  
17
- 18 • Unlike previous studies, the clinical risk scores will be validated against a prospective  
19 cohort of patients presenting with undifferentiated right iliac fossa pain, rather than  
20 patients who have undergone appendicectomy.  
21
- 22 • Within the remit of this observational study, it will not be possible track patient re-  
23 admissions to centres other than the index admitting hospital, or readmission rates  
24 beyond 30 days.  
25
- 26 • This protocol is designed to be carried out alongside routine clinical practice. This  
27 limits the quantity and complexity of data it is feasible to collect. Specific data  
28 regarding antibiotic therapy for RIF pain and presenting symptoms outside of those  
29 included within risk scores will not be collected.  
30  
31  
32  
33  
34  
35  
36  
37  
38  
39  
40  
41  
42  
43  
44  
45  
46  
47  
48  
49  
50  
51  
52  
53  
54  
55  
56  
57  
58  
59  
60

## Introduction

Right iliac fossa (RIF) pain is one of the commonest presentations to acute general surgical services [1]. Causes include appendicitis, other gastrointestinal, urological, gynaecological, vascular, and musculoskeletal pathologies. Given this range of potential pathologies, variation in presentation and similarity to other conditions, particularly ovarian pathologies in women of reproductive age, diagnosing appendicitis can be a challenge [2]. Traditionally, surgeons have relied upon clinical history, examination findings and basic laboratory investigations for diagnosis. Objective stratifiers such as the Appendicitis Inflammatory Response (AIR) [3] and Alvarado scores [4] have been developed to combat this diagnostic uncertainty; yet, these were derived from small retrospective cohorts, are poorly validated and not widely used [5].

Since delayed appendicectomy is associated with increased risk of complications, prompt diagnosis and treatment is essential [6]. Diagnostic uncertainty, coupled with the risks of diagnostic delay, has led to surgeons having a low threshold for operating on patients with equivocal symptoms resulting in high rates of negative appendicectomy: a national audit in 2012 found the UK's negative appendicectomy rate to be 20.6% [7, 8].

Recent guidelines stipulate that appendicectomy should be performed laparoscopically unless this is contraindicated [9, 10] (Table 1). However, in 2012 one third of patients underwent open appendicectomy [7]. Unlike laparoscopic surgery, open procedures typically commit the surgeon to proceed to appendicectomy even if the appendix is found to be macroscopically normal once visualised [8].

This study will test the hypothesis that, associated with increased take-up of laparoscopy, the negative appendicectomy rate will have decreased since 2012 [8]. In order to inform the implementation of recent guidelines which mandate risk stratification of patients with RIF pain,

1  
2  
3 this study will also validate the AIR and Alvarado scores in a large, prospective, international  
4 cohort [9,10].  
5  
6  
7  
8

### 9 10 **Methods and analysis**

11 This prospective, observational, multicentre study will be coordinated by trainee-led research  
12 networks which have been described previously [11, 12].  
13  
14  
15

#### 16 17 18 *Aims and objectives*

19 The primary aim of this study is to determine the negative appendectomy rate. The secondary  
20 aims of this study are to determine the rate of laparoscopy for appendectomy and to validate  
21 the AIRS and Alvarado scores for acute appendicitis. A centre survey will profile local policy and  
22 service delivery for management of patients presenting with RIF pain.  
23  
24  
25  
26  
27  
28  
29

#### 30 31 *Patients and centres*

32 Any hospital that offers acute general surgical services will be eligible to participate. Local  
33 collaborators at each centre will prospectively collect data during two-week long study periods,  
34 on consecutive patients referred to the general or paediatric surgery units with RIF pain or  
35 suspected appendicitis. Each centre will be able to submit data from up to 4 study periods  
36 between February and August 2017. Patients will be identified prospectively via hospital  
37 computer systems, handover lists, and by the clinical surgical team. Patients who are pregnant,  
38 have had abdominal surgery in the preceding 90 days, or have had previous appendectomy,  
39 right hemi-colectomy, or total colectomy will be excluded (Figure 1). Variables required to  
40 calculate the AIRS and Alvarado scores will be collected at time of presentation to the surgical  
41 unit.  
42  
43  
44  
45  
46  
47  
48  
49  
50  
51  
52  
53  
54  
55  
56  
57  
58  
59  
60



### *Follow up*

Patients will be followed throughout their admission to determine their treatment pathway and length of stay. Data will also be collected on histology and readmission rates, for both the operated and non-operated groups, within 30 days. Collaborators will access electronic records, emergency department and theatre systems, and patient notes to collect data. The group who undergo an operation will be followed up to determine the negative appendectomy rate, and the non-operative group will be followed up to allow for the validation of the AIR and Alvarado scores low risk prediction for this group. The non-operative group will also include those patients diagnosed as simple appendicitis and treated non-operatively and will require follow up to assess whether they then require a subsequent operation. No patient identifiable information will be collected.

### *Centre survey*

A consultant surgeon at each participating centre will complete a short questionnaire regarding the guidelines, protocols and resources available for the investigation and management of RIF pain in their hospital (Table 2).

### *Project management and recruitment*

The RIFT steering committee (Appendix 1) will be responsible for protocol development, data collection and data analysis. A structured system of national, regional and local leadership has been created to coordinate the RIFT study. National leads will oversee participation in RIFT within their countries through networks including the West Midlands Research Collaborative (WMRC), UK National Surgical Research Collaborative (NRC) and Italian Surgical Research Group (ItSurg), as well as through social media platforms [13]. Regional leads will recruit, advise and ensure the correct approvals are in place for each hospital within their region. Local leads will oversee data collection in their hospital, ensuring adherence to local governance protocols

1  
2  
3 and continuous data collection across the 2-week periods. Up to three collaborators per 2-week  
4 period, per hospital, will be recruited to participate. A secure server running the 'Research  
5 Electronic Data Capture' (REDCap, Boston, MA) web application hosted by the University of  
6 Birmingham, UK, will be used to collect and securely store data.  
7  
8  
9  
10

#### 11 12 13 14 *Sample size and statistical analysis*

15  
16 Based on pilot studies across four centres, we estimate that each centre will capture  
17 approximately 10 patients with RIF pain per week. The steering committee has received  
18 expressions of interest in participation from over 150 centres. It is estimated that around 75  
19 centres will participate during each period. This would result in approximately 6000 patients  
20 being included in RIFT across the four data collection periods. It is anticipated that around 20%  
21 (1200 patients) will undergo appendicectomy.  
22  
23  
24  
25  
26  
27  
28  
29  
30

31 Data will be reported in accordance with STROBE (Strengthening The Reporting of  
32 Observational studies in Epidemiology) guidelines for observational studies [14]. Differences  
33 between patient, disease and operative specific factors will be tested using Student's t-test for  
34 continuous data (p-value) and Chi-square for categorical data (reported as Chi-square, p-value).  
35 An  $\alpha$ -level of 0.05 will be accepted as significant.  
36  
37  
38  
39  
40  
41  
42  
43  
44

45 Pre-planned analyses will include, and are not limited to: (1) variation in the negative  
46 appendicectomy and laparoscopy rates across participating centres and countries; (2) predictive  
47 value of AIR and Alvarado risk scores. Sensitivity, specificity, positive predictive value and  
48 negative predictive value will be calculated for clinical risk scores. A panelled multi-level,  
49 multivariate, binary logistic regression model, including centre as a random effect, will be used  
50 to assess the association of clinical risk scores with negative appendicectomy. The model fit will  
51 be tested with Area under the Curve analysis, using Somer's test to derive a C-statistic.  
52  
53  
54  
55  
56  
57  
58  
59  
60

### *Ethics*

In the UK the online National Research Ethics Service (NRES) decision tool (<http://www.hra-decisiontools.org.uk>) confirmed that RIFT does not require research ethics approval in the UK. The RIFT study will be registered as a clinical audit in each participating UK centre. National leads in other countries will oversee appropriate registration and study approval, which may include completing full ethical review. Local investigators will be responsible for ensuring local approvals are in place, and will be required to demonstrate this in order to gain access to the online data collection tool.

### *Reporting and dissemination*

A consultant surgeon will facilitate presentation of local study results at a governance meeting at each participating centre. Peer-reviewed publications will be published under corporate authorship including 'RIFT Study Group' and 'West Midlands Research Collaborative'.

### **Discussion**

The RIFT study will be a large, multicentre, international, prospective observational study of undifferentiated patients presenting with RIF pain, and suspected appendicitis. By utilising a protocol driven, pre-planned data collection tool and analysis plan, this study will ensure high data quality, whilst minimising the burden on participating centres.

The 2012 national appendicectomy audit found a significant variation in management of appendicitis across the UK [7]. In light of recent guidelines stipulating that appendicectomy in adults should be performed laparoscopically unless contraindicated [9,10], the RIFT study offers the opportunity to examine health system-level quality improvement in the delivery of laparoscopic appendicectomy five years on from the 2012 study. By mapping real-life patient

1  
2  
3 pathways for investigation and management of RIF pain, RIFT will indicate whether any  
4 increased use of modern technologies, including CT scanning and laparoscopy, have been  
5 associated with a decrease in the rate of negative appendectomy.  
6  
7  
8  
9

10  
11 Validation of the AIR and Alvarado scores in a large international cohort will determine the  
12 suitability of using these to stratify patients in to low-, medium-, and high-risk groups for  
13 appendicitis, as envisaged by recent guidelines [9]. If these risk scores are found to have poor  
14 prognostic properties, it may be possible to develop and validate a new score based on the  
15 RIFT dataset. Risk scores may aid junior clinicians' decision making and may have a role in  
16 avoiding unnecessary operations, reducing the negative appendectomy rate, and improving  
17 patient safety [5]. Furthermore, validated risk scores may be particularly useful in low resource  
18 settings with limited access to diagnostic investigations.  
19  
20  
21  
22  
23  
24  
25  
26  
27  
28  
29

30  
31 The UK National Surgical Research Collaborative's member groups have run trainee-led  
32 collaborative studies across 99% of the UK's surgical units [12], delivering large, prospective  
33 studies [7]. However, as trainees complete their training and become consultants, the  
34 sustainability of postgraduate trainee research collaboratives will be dependent on engaging  
35 new junior trainees each year. Whereas previous studies undertaken by surgical research  
36 collaboratives have been targeted at either senior trainees or medical students, RIFT is the first  
37 study aimed at junior specialty trainees (recent graduates). A surrogate marker for the success  
38 of RIFT will therefore be successful engagement and mentoring of junior trainees in  
39 collaborative research.  
40  
41  
42  
43  
44  
45  
46  
47  
48  
49  
50

### 51 52 53 *Limitations*

54  
55 The RIFT Study Group has made specific efforts to minimise the risk of inherent bias in this  
56 observational study. Data will be collected prospectively and patient pathways followed  
57  
58  
59  
60

1  
2  
3 proactively by collaborators, who will often be the frontline clinicians responsible for the patients'  
4 care. Unlike most previous studies which have focused specifically on patients who undergo  
5 appendicectomy, RIFT will include all patients presenting with RIF pain or suspected  
6 appendicitis, to general surgical services. Nonetheless, since these patients will have already  
7 been triaged by emergency department or general practice doctors, this is likely to be a selected  
8 group who are more likely to have appendicitis than patients with truly undifferentiated  
9 presentations.  
10  
11  
12  
13  
14  
15  
16  
17  
18  
19

20  
21 Given the large volume of patients presenting with RIF pain and the short inpatient stays that  
22 most patients have, reliably identifying all eligible patients will be more challenging than in  
23 previous studies run by trainee collaboratives. However, pre-planned validation by an  
24 independent investigator will ensure that case ascertainment rates are monitored. This will also  
25 mitigate any risk of reporting bias from clinicians declining to submit details of patients that have  
26 been misdiagnosed at their centre.  
27  
28  
29  
30  
31  
32  
33  
34  
35

36 A centre survey has been developed to determine details about participating centres resources  
37 and policies (Table 2). Due to the large number of centres involved in this study from different  
38 countries and health systems, it is anticipated that there may be variation in the resources  
39 available, such as CT scanning and review clinics. By asking for details of this resource  
40 variation in advance we aim to control for this in our statistical analysis.  
41  
42  
43  
44  
45  
46  
47  
48

49 Due to the pragmatic 'snap-shot' nature of this study, carried out by practicing clinicians, there is  
50 a limit to the depth and breadth of data points included. For instance, the study will not collect  
51 the length and nature of peri-operative antibiotic treatment (Table 1). Furthermore, follow up is  
52 limited to 30 days after the index hospital admission. It is possible that a proportion of patients  
53  
54  
55  
56  
57  
58  
59  
60

1  
2  
3 initially discharged having not undergone appendicectomy may subsequently be readmitted and  
4  
5 undergo surgery either at other hospitals or beyond the 30 day follow up.  
6  
7

8  
9  
10 In summary, the RIFT study is a protocol-driven, international, multicentre prospective  
11  
12 observational study using a 'snap-shot' methodology, in line with the UK surgical research  
13  
14 collaborative model. The study aims to describe the current variation in investigation and  
15  
16 management of right iliac fossa pain in several European countries, aligned to  
17  
18 contemporaneous specialty guidelines.  
19

**Authors' contributions:**

Conception and writing of protocol: Jacob H Matthews, Gabriella L Morley, Shivam Bhanderi, Sarus Jain, Imran Mohamed, Thuvarahan Amuthalingam, Robert Tyler, James C Glasbey, Richard Wilkin, Dmitri Nepogodiev, Aneel Bhangu

Participation in collaborator meeting, development of study concept, and editing of protocol: Jacob H Matthews, Gabriella L Morley, Shivam Bhanderi, Sarus Jain, Imran Mohamed, Thuvarahan Amuthalingam, Robert Tyler, James C Glasbey, Ewen Griffiths, Thomas Pinkney, Oliver Gee, Dion Morton, Francesco Pata, Gianluca Pellino, Valeria Farina, Laura Gavagna, Pietro Maria Naccari, Sandro Pasquali, Bruno Sensi, Alessandro Sgrò, Andrea Simioni, Ruth Blanco-Colino, Matteo Frasson, Antonio Sampaio Soares, Natalie Blencowe, Will Bolton, Stephen Chapman, Catherine Bradshaw, Grant Harris, James Haddow, Kapil Sahnun, John Mason, Scott McCain, David Milgrom, Saleem Noor Mohamed, James O'Brien, Jack Pearce, Mohammed Rabie, Gaël R. Nana, Panchali Sarmah, Nigel Jamieson, Richard Wilkin, Aneel Bhangu, Dmitri Nepogodiev.

Guarantor: Aneel Bhangu,

All authors read and approved the final manuscript.

Funding statement: None to declare.

Competing interests: None to declare.

Data sharing statement: All data from this study will be available on request.

## References

- [1] Royal College of Surgeons and Association of Surgeons of Great Britain and Ireland. Commissioning guide 2014: emergency general surgery (acute abdominal pain). London. 2014. Available from: <https://www.rcseng.ac.uk/-/media/.../commissioning-guide--egs-published-v3.pdf> accessed on 1st January 2017.
- [2] Bhangu A, Søreide K, Di Saverio S, Assarsson JH, Drake FT. Acute appendicitis: modern understanding of pathogenesis, diagnosis, and management. *Lancet*. 2015 Sep 26;386(10000):1278-87.
- [3] Andersson M, Andersson RE. The appendicitis inflammatory response score: a tool for the diagnosis of acute appendicitis that outperforms the Alvarado score. *World J Surg* 2008; 32:1843–1849
- [4] Alvarado A. A practical score for the early diagnosis of acute appendicitis. *Ann Emerg Med* 1986;15:557–564
- [5] Kularatna M, Lauti M, Haran C, et al. Clinical Prediction Rules for Appendicitis in Adults: Which Is Best? *World J Surg* 2017:1-13
- [6] Bhangu A. Safety of short, in-hospital delayers before surgery for acute appendicitis: multicenter cohort study, systematic review, and meta-analysis. *Ann Surg* 2014;259:894-903
- [7] National Surgical Research Collaborative. Multicentre observational study of performance variation in provision and outcome of emergency appendicectomy. *Br J Surg* 2013 ;100:1240–52
- [8] Baird DLH, Simillis C, Kontovounisios C, Rasheed S, Tekkis PP. Acute appendicitis. *BMJ*. 2017 Apr 19;357:j1703.
- [9] Di Saverio S, Birindelli A, Kelly MD, et al. WSES Jerusalem guidelines for diagnosis and treatment of acute appendicitis. *World Journal of Emergency Surgery* : WJES. 2016;11:34.
- [10] Gorter RR, Eker HH, Gorter-Stam MAW, et al. Diagnosis and management of acute appendicitis. EAES consensus development conference 2015. *Surgical Endoscopy* 2016;30:4668-4690.
- [11] Bhangu A, Koliass AG, Pinkney T, Hall NJ, Fitzgerald JE et al. Surgical research collaboratives in the UK. *Lancet* 2013;382:1091–2.
- [12] Nepogodiev D, Chapman SJ, Koliass AG, Fitzgerald JE, Lee M, Blencowe NS. (On behalf of the National Surgical Research Collaborative). The impact of research collaboratives in the UK. *Lancet Gastroenterology & Hepatology* 2017;2(4):247-248.
- [13] Khatri C, Chapman SJ, Glasbey J, et al. Social media and internet driven study recruitment: evaluating a new model for promoting collaborator engagement and participation. *PLoS ONE* 2015;10: e0118899.
- [14] Von Elm E, Altman DG, Egger M, Pocock SJ, Gøtzsche PC, Vandenbroucke JP, Strobe Initiative. The Strengthening the Reporting of Observational Studies in Epidemiology (STROBE) Statement: guidelines for reporting observational studies. *International Journal of Surgery* 2014 Dec 31;12(12):1495-9.



**Table 1:**

A complete compilation and comparison of the World Society of Emergency surgery's (WSES 2016) and the European Association of Endoscopic Surgery's (EAES 2016) guidance on the investigation and management of appendicitis. Those statements captured within the RIFT study's data collection have been highlighted. The EAES guidance is split into statements (S) and recommendations (R) under three sections; pre-operative care, operative managements and after care. The WSES guidance is numbered and listed under the sections described in the table.

For peer review only

| Society                                                  | Statement Number | Guidance statement                                                                                                                                                                                                                                                                                   | Captured within the RIFT Study |
|----------------------------------------------------------|------------------|------------------------------------------------------------------------------------------------------------------------------------------------------------------------------------------------------------------------------------------------------------------------------------------------------|--------------------------------|
| 1) Diagnostic efficiency of clinical scoring systems     |                  |                                                                                                                                                                                                                                                                                                      |                                |
| EAES                                                     | Pre-Op R1        | The combined variables of clinical assessment and biochemical testing in the Alvarado score should be used to determine the likelihood of appendicitis.                                                                                                                                              | Yes                            |
| WSES                                                     | 1.1              | The Alvarado score (with cutoff score < 5) is sufficiently sensitive to exclude acute appendicitis.                                                                                                                                                                                                  | Yes                            |
| WSES                                                     | 1.2              | The Alvarado score is not sufficiently specific in diagnosing acute appendicitis.                                                                                                                                                                                                                    | Yes                            |
| WSES                                                     | 1.3              | An ideal (high sensitivity and specificity), clinically applicable, diagnostic scoring system/clinical rule remains outstanding. This remains an area for future research                                                                                                                            | Yes                            |
| 2) Role of imaging                                       |                  |                                                                                                                                                                                                                                                                                                      |                                |
| WSES                                                     | 2.1              | In patients with suspected appendicitis a tailored individualised approach is recommended, depending on disease probability, sex and age of the patient                                                                                                                                              | Yes                            |
| WSES                                                     | 2.2              | Imaging should be linked to Risk Stratification such as AIR or Alvarado score                                                                                                                                                                                                                        | Yes                            |
| WSES                                                     | 2.3              | Low risk patients being admitted to hospital and not clinically improving or reassessed score could have appendicitis ruled-in or out by abdominal CT                                                                                                                                                | Yes                            |
| WSES                                                     | 2.4              | Intermediate risk classification identifies patients likely to benefit from observation and systematic diagnostic imaging.                                                                                                                                                                           | Yes                            |
| WSES                                                     | 2.5              | High risk patients (younger than 60 years old) may not require preoperative imaging.                                                                                                                                                                                                                 | Yes                            |
| EAES                                                     | Pre-Op R2        | We recommend that ultrasound should be performed as a first level diagnostic imaging although it has lower diagnostic value in case radiological confirmation is desirable.                                                                                                                          | Yes                            |
| WSES                                                     | 2.6              | US Standard reporting templates for ultrasound and US three step sequential positioning may enhance over accuracy.                                                                                                                                                                                   |                                |
| EAES                                                     | Pre-Op R3        | If after ultrasound the diagnosis of appendicitis is not confirmed nor ruled out we suggest that additional imaging studies (either a CT or MRI) should be performed.                                                                                                                                | Yes                            |
| EAES                                                     | Pre-Op R4        | In obese patients, a CT or MRI is more accurate than ultrasonography; In case of diagnostic doubt we recommend a CT or MRI in these specific patients.                                                                                                                                               |                                |
| EAES                                                     | Pre-Op R5        | In pregnant patients radiation should be avoided; In case of diagnostic doubt we recommend an MRI in these specific patients.                                                                                                                                                                        |                                |
| WSES                                                     | 2.7              | MRI is recommended in pregnant patients with suspected appendicitis, if this resource is available                                                                                                                                                                                                   |                                |
| EAES                                                     | Pre-Op R6        | In children radiation should be avoided; In case of diagnostic doubt we recommend an MRI in these specific patients.                                                                                                                                                                                 | Yes                            |
| 3) Nonoperative treatment for uncomplicated appendicitis |                  |                                                                                                                                                                                                                                                                                                      |                                |
| WSES                                                     | 3.1              | Antibiotic therapy can be successful in selected patients with uncomplicated appendicitis who wish to avoid surgery and accept the risk up to 38 % recurrence.                                                                                                                                       | Yes                            |
| EAES                                                     | Pre-Op R7        | Non-operative treatment (with antibiotics) of uncomplicated appendicitis in adults is not suggested as high quality evidence of superiority is still lacking.                                                                                                                                        | Yes                            |
| WSES                                                     | 3.2              | Current evidence supports initial intravenous antibiotics with subsequent conversion to oral antibiotics.                                                                                                                                                                                            |                                |
| WSES                                                     | 3.3              | In patients with normal investigations and symptoms unlikely to be appendicitis but which do not settle; 1) Cross-sectional imaging is recommended before surgery; 2) Laparoscopy is the surgical approach of choice; and 3) There is inadequate evidence to recommend a routine approach at present | Yes                            |
| 4) Timing of appendectomy and in-hospital delay          |                  |                                                                                                                                                                                                                                                                                                      |                                |
| WSES                                                     | 4.1              | Short, in-hospital surgical delay up to 12/24 h is safe in uncomplicated acute appendicitis and does not increase complications and/or perforation rate.                                                                                                                                             | Yes                            |
| WSES                                                     | 4.2              | Surgery for uncomplicated appendicitis can be planned for next available list minimizing delay wherever possible (patient comfort etc.).                                                                                                                                                             | Yes                            |

|                       |               |                                                                                                                                                                                                                                                                                |     |
|-----------------------|---------------|--------------------------------------------------------------------------------------------------------------------------------------------------------------------------------------------------------------------------------------------------------------------------------|-----|
| EAES                  | Operative R1  | We recommend that surgery is performed as soon as feasible after diagnosis.                                                                                                                                                                                                    | Yes |
| 5) Surgical treatment |               |                                                                                                                                                                                                                                                                                |     |
| WSES                  | 5.1.1         | Laparoscopic appendectomy should represent the first choice where laparoscopic equipment and skills are available, since it offers clear advantages in terms of less pain, lower incidence of SSI, decreased LOS, earlier return to work and overall costs.                    | Yes |
| EAES                  | Pre-Op R8     | Laparoscopic appendectomy is recommended as the procedure of choice in adults with uncomplicated acute appendicitis.                                                                                                                                                           | Yes |
| WSES                  | 5.1.2         | Laparoscopy offers clear advantages and should be preferred in obese patients, older patients and patients with comorbidities                                                                                                                                                  | Yes |
| EAES                  | Pre-Op R11    | Laparoscopic appendectomy is recommended as the procedure of choice in obese patients with acute appendicitis.                                                                                                                                                                 | Yes |
| EAES                  | Pre-Op R14    | Laparoscopic appendectomy is recommended as the procedure of choice in patients over 65 years of age.                                                                                                                                                                          | Yes |
| WSES                  | 5.1.3         | Laparoscopy is feasible and safe in young male patients although no clear advantages can be demonstrated in such patients.                                                                                                                                                     | Yes |
| WSES                  | 5.1.4         | Laparoscopy should not be considered as a first choice over open appendectomy in pregnant patients                                                                                                                                                                             |     |
| EAES                  | Pre-Op R12    | Laparoscopic appendectomy is suggested as the procedure of choice in pregnant patients with acute appendicitis. It should even be considered in the third trimester.                                                                                                           |     |
| WSES                  | 5.1.5         | No major benefits have also been observed in laparoscopic appendectomy in children, but it reduces hospital stay and overall morbidity                                                                                                                                         | Yes |
| EAES                  | Pre-Op R13    | Laparoscopic appendectomy is suggested as the procedure of choice in children with acute appendicitis and an indication for appendectomy.                                                                                                                                      | Yes |
| WSES                  | 5.1.6         | In experienced hands, laparoscopy is more beneficial and cost-effective than open surgery for complicated appendicitis                                                                                                                                                         | Yes |
| EAES                  | Pre-Op R9     | Laparoscopic appendectomy is suggested as the procedure of choice in patients with perforated appendicitis.                                                                                                                                                                    | Yes |
| EAES                  | After Care R2 | We suggest the use of local anesthetic for subcutaneous and muscular infiltration of incision sites prior to incision.                                                                                                                                                         |     |
| EAES                  | Operative R6  | Open: supine, one or both arms out, surgeon at the right side, assistant on the left side. Laparoscopic: supine, right arm out, left arm along the body, surgeon and assistant on the left side.                                                                               |     |
| EAES                  | Operative R7  | The consensus held a preference for open access to the peritoneal cavity because of rare but serious complications associated with the Verrees needle.                                                                                                                         |     |
| EAES                  | Operative R8  | Based upon the literature no recommendation can be made which trocars should be used and their placement. This should be left at the surgeon's discretion. Three-port technique should be standard. Single port approaches can be used by surgeons with sufficient experience. |     |
| WSES                  | 5.2           | Peritoneal irrigation does not have any advantages over suction alone in complicated appendicitis                                                                                                                                                                              |     |
| WSES                  | 5.3.1         | There are no clinical differences in outcomes, LOS and complications rates between the different techniques described for mesentery dissection (monopolar electrocoagulation, bipolar energy, metal clips, endoloops, Ligasure, Harmonic Scalpel etc.).                        |     |
| WSES                  | 5.3.2         | Monopolar electrocoagulation and bipolar energy are the most cost-effective techniques, even if more experience and technical skills is required to avoid potential complications (e.g. bleeding) and thermal injuries.                                                        |     |
| WSES                  | 5.4.1         | There are no clinical advantages in the use of endostapler over endoloops for stump closure for both adults and children                                                                                                                                                       |     |
| EAES                  | Operative R10 | The use of stapler or suturing is recommended over clips or endoloops when the appendix base is inflamed, necrotic or perforated. The use of alternative measures to secure the appendiceal stump in this case may be                                                          |     |

|                                                                                             |               |                                                                                                                                                                                                                                                                                                                                  |     |
|---------------------------------------------------------------------------------------------|---------------|----------------------------------------------------------------------------------------------------------------------------------------------------------------------------------------------------------------------------------------------------------------------------------------------------------------------------------|-----|
|                                                                                             |               | insufficient.                                                                                                                                                                                                                                                                                                                    |     |
| EAES                                                                                        | After Care R4 | In order to prevent stump appendicitis, it is suggested that the appendiceal stump should be no longer than 0.5cm. Timely diagnosis allows laparoscopic stump resection. Delayed diagnosis may require extended bowel resection.                                                                                                 |     |
| WSES                                                                                        | 5.4.2         | Endoloops might be preferred for lowering the costs when appropriate skills/learning curve are available                                                                                                                                                                                                                         |     |
| WSES                                                                                        | 5.4.3         | There are no advantages of stump inversion over simple ligation, either in open or laparoscopic surgery                                                                                                                                                                                                                          |     |
| WSES                                                                                        | 5.5.1         | Drains are not recommended in complicated appendicitis in paediatric patients                                                                                                                                                                                                                                                    |     |
| EAES                                                                                        | Operative R4  | It is suggested that there is no indication for routine postoperative nasogastric tube placement in children or adults.                                                                                                                                                                                                          |     |
| EAES                                                                                        | Operative R11 | It is recommended that extraction of the appendix should avoid direct contact of the appendix and the abdominal wall. There are several methods of achieving this and there is no evidence supporting one above the other.                                                                                                       |     |
| EAES                                                                                        | Operative R5  | It is suggested that there is no indication for routine postoperative catheter placement in children or adults.                                                                                                                                                                                                                  |     |
| WSES                                                                                        | 5.5.2         | In adult patients, drain after appendectomy for perforated appendicitis and abscess/peritonitis should be used with judicious caution, given the absence of good evidence from the literature. Drains did not prove any efficacy in preventing intraabdominal abscess and seem to be associated with delayed hospital discharge. |     |
| EAES                                                                                        | Operative R12 | In general, meticulous suction of intra-peritoneal fluid or collections is suggested; the philosophy should be: "leave no pus behind". Routine use of drains in appendectomy is not recommended.                                                                                                                                 |     |
| WSES                                                                                        | 5.6           | Delayed primary skin closure does not seem beneficial for reducing the risk of SSI and increase LOS in open appendectomies with contaminated/dirty wounds                                                                                                                                                                        |     |
| EAES                                                                                        | Operative R13 | Primary wound closure is recommended for all cases of open appendectomy.                                                                                                                                                                                                                                                         |     |
| EAES                                                                                        | Operative S1  | Various reasons exist to convert LA. However, no recommendation about when to convert can be given. It should be stated that conversion to open surgery is not regarded as a complication.                                                                                                                                       | Yes |
| EAES                                                                                        | After Care R3 | There is no reason to restrict the postoperative diet after an uncomplicated appendectomy.                                                                                                                                                                                                                                       |     |
| 6) Scoring systems for intraoperative grading of appendicitis and their clinical usefulness |               |                                                                                                                                                                                                                                                                                                                                  |     |
| WSES                                                                                        | 6.1           | The incidence of unexpected findings in appendectomy specimens is low but the intraoperative diagnosis alone is insufficient for identifying unexpected disease. From the current available evidence, routine histopathology is necessary                                                                                        | Yes |
| EAES                                                                                        | After Care R1 | It is recommended to send all appendices to the pathology department routinely and the operated will review the results.                                                                                                                                                                                                         | Yes |
| EAES                                                                                        | Operative R15 | It is suggested that definitive treatment of a suspected malignancy will depend on final histological and staging information after initial treatment of the operative findings and may require further surgery or adjunct treatment.                                                                                            |     |
| WSES                                                                                        | 6.2           | There is a lack of validated system for histological classification of acute appendicitis and controversies exist on this topic.                                                                                                                                                                                                 |     |
| WSES                                                                                        | 6.3           | Surgeon's macroscopic judgement of early grades of acute appendicitis is inaccurate                                                                                                                                                                                                                                              | Yes |
| WSES                                                                                        | 6.4           | If the appendix looks "normal" during surgery and no other disease is found in symptomatic patient, we recommend removal in any case.                                                                                                                                                                                            | Yes |
| EAES                                                                                        | Operative R9  | It is suggested to remove the "normal" appearing appendix when operating for suspected appendicitis when no other pathology is identified.                                                                                                                                                                                       | Yes |
| WSES                                                                                        | 6.5           | We recommend adoption of a grading system for acute appendicitis based on clinical, imaging and operative findings, which can allow identification of homogeneous groups of patients, determining optimal grade disease management and comparing therapeutic modalities                                                          |     |

| 7) Nonsurgical treatment for complicated appendicitis: abscess or phlegmone |               |                                                                                                                                                                                                                                                               |     |
|-----------------------------------------------------------------------------|---------------|---------------------------------------------------------------------------------------------------------------------------------------------------------------------------------------------------------------------------------------------------------------|-----|
| WSES                                                                        | 7.1           | Percutaneous drainage of a peri-appendiceal abscess, if accessible, is an appropriate treatment in addition to antibiotics for complicated appendicitis.                                                                                                      | Yes |
| WSES                                                                        | 7.2           | Nonoperative management is a reasonable first line treatment for appendicitis with phlegmon or abscess                                                                                                                                                        | Yes |
| EAES                                                                        | After Care R5 | Initial treatment of intra-abdominal abscess (IAA) is conservative with antibiotics. In some patients, this may need to be combined with radiological or surgical drainage.                                                                                   | Yes |
| EAES                                                                        | Pre-Op R10    | Non-operative treatment is suggested as the procedure of choice for patients with an appendiceal mass in the absence of diffuse peritonitis. Data are lacking on the benefits of interval appendectomy.                                                       | Yes |
| WSES                                                                        | 7.3           | Operative management of acute appendicitis with phlegmon or abscess is a safe alternative to nonoperative management in experienced hands                                                                                                                     | Yes |
| EAES                                                                        | Operative R14 | It is recommended to treat an inflammatory mass conservatively. We recommend that when encountered during laparoscopy, refrain from appendectomy. During follow-up: additional imaging is advised. Data are lacking on the benefits of interval appendectomy. |     |
| WSES                                                                        | 7.4           | Interval appendectomy is not routinely recommended both in adults and children.                                                                                                                                                                               | Yes |
| WSES                                                                        | 7.5           | Interval appendectomy is recommended for those patients with recurrent symptoms.                                                                                                                                                                              | Yes |
| WSES                                                                        | 7.6           | Colonic screening should be performed in those patients with appendicitis treated non-operatively if >40y/o                                                                                                                                                   |     |
| 8) Preoperative and Postoperative Antibiotics                               |               |                                                                                                                                                                                                                                                               |     |
| WSES                                                                        | 8.1           | In patients with acute appendicitis preoperative broad-spectrum antibiotics are always recommended                                                                                                                                                            |     |
| EAES                                                                        | Operative R2  | Prophylactic antibiotics are recommended in appendectomy in adults.                                                                                                                                                                                           |     |
| EAES                                                                        | Operative R3  | Prophylactic antibiotics are recommended in appendectomy in children.                                                                                                                                                                                         |     |
| WSES                                                                        | 8.2           | For patients with uncomplicated appendicitis, postoperative antibiotics are not recommended                                                                                                                                                                   |     |
| EAES                                                                        | After Care S1 | Evidence for duration of administration of postoperative antibiotics is lacking.                                                                                                                                                                              |     |
| EAES                                                                        | After Care S2 | There is no evidence of routine use of postoperative antibiotics in uncomplicated appendicitis.                                                                                                                                                               |     |
| EAES                                                                        | After Care R6 | In complicated appendicitis, postoperative antibiotics are recommended.                                                                                                                                                                                       |     |
| WSES                                                                        | 8.3           | In patients with complicated acute appendicitis, postoperative, broad-spectrum antibiotics are always recommended                                                                                                                                             |     |
| WSES                                                                        | 8.4           | Although discontinuation of antimicrobial treatment should be based on clinical and laboratory criteria such as fever and leucocytosis, a period of 3–5 days for adult patients is generally recommended                                                      |     |

Table 2: Centre Survey

|                                                    | Data Criteria                                                                                                                                  | Options                                                                                                                                                                                                                 |
|----------------------------------------------------|------------------------------------------------------------------------------------------------------------------------------------------------|-------------------------------------------------------------------------------------------------------------------------------------------------------------------------------------------------------------------------|
| <i>Centre details</i>                              |                                                                                                                                                |                                                                                                                                                                                                                         |
| 1(a)                                               | Does your unit care for?                                                                                                                       | <ul style="list-style-type: none"> <li>▪ Adults only</li> <li>▪ Children only</li> <li>▪ Adults and children</li> </ul>                                                                                                 |
| 2                                                  | Does your hospital have an on-site gynaecology service?                                                                                        | <ul style="list-style-type: none"> <li>▪ Yes</li> <li>▪ No</li> </ul>                                                                                                                                                   |
| 3                                                  | Does your centre have 'review clinic' slots for patients to return for further assessment/imaging the following day if a diagnosis is unclear? | <ul style="list-style-type: none"> <li>▪ Yes – with ultrasound and clinical review</li> <li>▪ Yes – clinical review only</li> <li>▪ No</li> </ul>                                                                       |
| 4(a)                                               | How many <b>consultants</b> will be "on call" during the 2 week study period?                                                                  | Number =                                                                                                                                                                                                                |
| 4(b)                                               | How many consultant general surgeons work at your centre?                                                                                      | Number =                                                                                                                                                                                                                |
| 4 (c)                                              | Is there a <b>dedicated</b> registrar based on SAU to review patients?                                                                         | <ul style="list-style-type: none"> <li>▪ Yes – 24/7</li> <li>▪ Yes – During the day</li> <li>▪ No – One registrar splits time between theatre and SAU</li> </ul>                                                        |
| 5                                                  | At weekends, Is ultrasound available?                                                                                                          | <ul style="list-style-type: none"> <li>▪ Yes</li> <li>▪ No</li> </ul>                                                                                                                                                   |
| 6(a)                                               | At weekends, is CT available?                                                                                                                  | <ul style="list-style-type: none"> <li>▪ Equivalent to weekday service</li> <li>▪ Reduced service but available for urgent surgical requests</li> <li>▪ Not available</li> </ul>                                        |
| 6(b)                                               | At night, is CT available?                                                                                                                     | <ul style="list-style-type: none"> <li>▪ Equivalent to weekday service</li> <li>▪ Reduced service but available for urgent surgical requests</li> <li>▪ Not available</li> </ul>                                        |
| <i>Does your centre have an agreed policy for:</i> |                                                                                                                                                |                                                                                                                                                                                                                         |
| 7                                                  | When to use appendicitis risk stratification scores?                                                                                           | <ul style="list-style-type: none"> <li>▪ Yes – use of score recommended</li> <li>▪ Yes – use of score discouraged</li> <li>▪ No policy in place</li> </ul>                                                              |
| 8                                                  | Which patients should have a CT scan prior to appendicectomy? ( <i>e.g. diagnosis unclear, age &gt;50</i> )                                    | <ul style="list-style-type: none"> <li>▪ Yes – please detail</li> <li>▪ No policy in place</li> </ul>                                                                                                                   |
| 9                                                  | Whether some patients with appendicitis may be managed non-operatively?                                                                        | <ul style="list-style-type: none"> <li>▪ Yes –conservative management recommended for some patients; please detail</li> <li>▪ Yes – policy discourages conservative management</li> <li>▪ No policy in place</li> </ul> |
| 10                                                 | Whether laparoscopic or open appendicectomy should be routinely performed?                                                                     | <ul style="list-style-type: none"> <li>▪ Yes – open surgery recommended</li> <li>▪ Yes – laparoscopic surgery recommended</li> </ul>                                                                                    |

|    |                                                                                      |                                                                                                                                                            |
|----|--------------------------------------------------------------------------------------|------------------------------------------------------------------------------------------------------------------------------------------------------------|
|    |                                                                                      | <ul style="list-style-type: none"><li>▪ No policy in place</li></ul>                                                                                       |
| 11 | Whether a macroscopically normal looking appendix should be removed or left in situ? | <ul style="list-style-type: none"><li>▪ Yes – removal recommended</li><li>▪ Yes – recommend it be left in situ</li><li>▪ No – no policy in place</li></ul> |

For peer review only

1  
2  
3  
4  
5  
6  
7  
8  
9  
10  
11  
12  
13  
14  
15  
16  
17  
18  
19  
20  
21  
22  
23  
24  
25  
26  
27  
28  
29  
30  
31  
32  
33  
34  
35  
36  
37  
38  
39  
40  
41  
42  
43  
44  
45  
46  
47  
48  
49  
50  
51  
52  
53  
54  
55  
56  
57  
58  
59  
60

**Figure 1: study flowchart**

For peer review only



1  
2  
3  
4  
5  
6  
7  
8  
9  
10  
11  
12  
13  
14  
15  
16  
17  
18  
19  
20  
21  
22  
23  
24  
25  
26  
27  
28  
29  
30  
31  
32  
33  
34  
35  
36  
37  
38  
39  
40  
41  
42  
43  
44  
45  
46  
47  
48  
49  
50  
51  
52  
53  
54  
55  
56  
57  
58  
59  
60

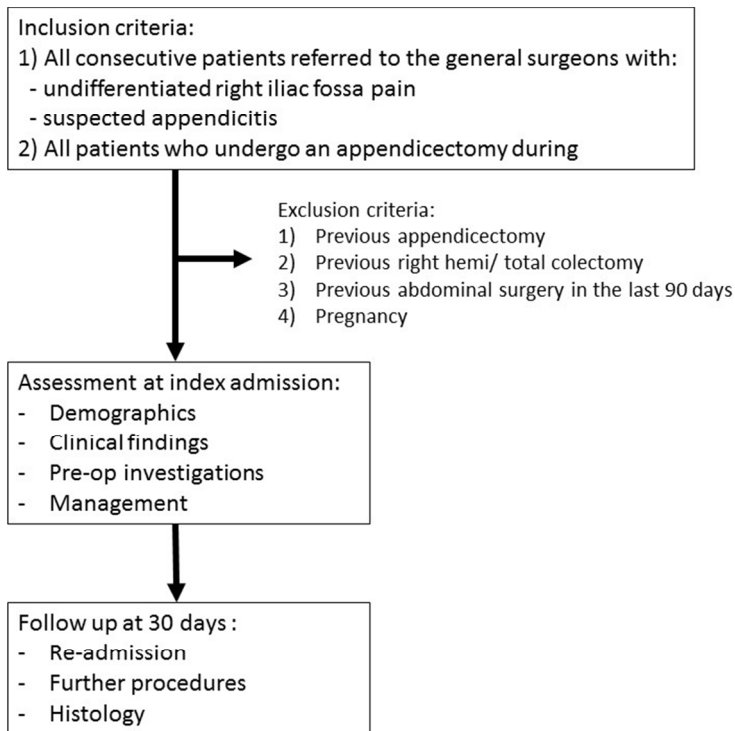

Figure 1: study flowchart

81x60mm (300 x 300 DPI)

ew only

## Appendix 1

### RIFT Study Group

**Steering Committee:** Jacob H Matthews<sup>±</sup>, Gabriella L Morley, Shivam Bhanderi, Sarus Jain, Imran Mohamed, Thuvarahan Amuthalingam, Robert Tyler, James C Glasbey, Richard Wilkin, Dmitri Nepogodiev, Aneel Bhangu (senior author)

**Advisory Group:** Ewen Griffiths, Thomas Pinkney, Oliver Gee, Dion Morton

**Italian Surgical Research Group:** Francesco Pata, Gianluca Pellino, Valeria Farina, Laura Gavagna, Pietro Maria Naccari, Sandro Pasquali, Bruno Sensi, Alessandro Sgrò, Andrea Simioni

**RIFT Spain and Portugal Leads:** Ruth Blanco-Colino, Matteo Frasson, Antonio Sampaio Soares

**RIFT UK Regional Leads:** Natalie Blencowe (Severn & Peninsula Audit and Research Collaborative\*); Will Bolton, Stephen Chapman (Yorkshire Surgical Research Collaborative\*); Catherine Bradshaw (Paediatric Surgery Trainee Research Network\*); Grant Harris (Northern Surgical Trainees Research Association\*); James Haddow, Kapil Sahnun (London Surgical Research Group\*); John Mason (Oxford Surgical Collaborative for Audit and Research\*); Scott McCain (Northern Ireland Surgical Research Collaborative\*); David Milgrom (North West Research Collaborative\*); Saleem Noor Mohamed (West Midlands Research Collaborative\*); James O'Brien (East of England Surgical Research Group\*); Jack Pearce (Welsh Barbers Surgical Research Group\*); Mohammed Rabie (Kent and Medway); Gaël R. Nana, Panchali Sarmah (East Midlands Surgical Academic Network\*), Nigel Jamieson (Scotland).

<sup>±</sup>Steering Committee Chairman

\*Corporate authorships of UK trainee surgical research collaboratives, also PubMed citable.
