# Supplementary material for: Right Iliac Fossa Pain Treatment (RIFT) Study: protocol for an international, multicentre, prospective observational study
Source: PubMed Central journal article supplement — BMJ Open. 2018 Jan 13;8(1):e017574. doi: 10.1136/bmjopen-2017-017574 (PMC5780718; doi:10.1136/bmjopen-2017-017574), 2018-01-13
Supplement: bmjopen-2017-017574supp001.pdf [file bmjopen-2017-017574supp001.pdf]

## **Appendix 1**

### **RIFT Study Group**

**Steering Committee:** Jacob H Matthews<sup>±</sup>, Gabriella L Morley, Shivam Bhanderi, Sarus Jain, Imran Mohamed, Thuvarahan Amuthalingam, Robert Tyler, James C Glasbey, Richard Wilkin, Dmitri Nepogodiev, Aneel Bhangu (senior author)

**Advisory Group:** Ewen Griffiths, Thomas Pinkney, Oliver Gee, Dion Morton

**Italian Surgical Research Group:** Francesco Pata, Gianluca Pellino, Valeria Farina, Laura Gavagna, Pietro Maria Naccari, Sandro Pasquali, Bruno Sensi, Alessandro Sgrò, Andrea Simioni

**RIFT Spain and Portugal Leads:** Ruth Blanco-Colino, Matteo Frasson, Antonio Sampaio Soares

**RIFT UK Regional Leads:** Natalie Blencowe (Severn & Peninsula Audit and Research Collaborative\*); Will Bolton, Stephen Chapman (Yorkshire Surgical Research Collaborative\*); Catherine Bradshaw (Paediatric Surgery Trainee Research Network\*); Grant Harris (Northern Surgical Trainees Research Association\*); James Haddow, Kapil Sahnani (London Surgical Research Group\*); John Mason (Oxford Surgical Collaborative for Audit and Research\*); Scott McCain (Northern Ireland Surgical Research Collaborative\*); David Milgrom (North West Research Collaborative\*); Saleem Noor Mohamed (West Midlands Research Collaborative\*); James O'Brien (East of England Surgical Research Group\*); Jack Pearce (Welsh Barbers Surgical Research Group\*); Mohammed Rabie (Kent and Medway); Gaël R. Nana, Panchali Sarmah (East Midlands Surgical Academic Network\*), Nigel Jamieson (Scotland).

<sup>±</sup>Steering Committee Chairman

\*Corporate authorships of UK trainee surgical research collaboratives, also PUBMed citable.
